# Supplementary material for: Metabolomics reveals that engineered nanomaterial exposure in soil alters both soil rhizosphere metabolite profiles and maize metabolic pathways
Source: Royal Society of Chemistry journal article supplement (doi:10.1039/c9en00137a), 2019-01-01
Supplement: c9en00137a1.pdf [file c9en00137a1.pdf]

*Supporting Information for*

# **Metabolomics Reveal that Engineered Nanomaterial Exposure in Soil Alters Both Soil Rhizosphere Metabolite Profiles and Maize Metabolic Pathways**

Lijuan Zhao<sup>§,\*</sup>, Huiling Zhang<sup>§</sup>, Jason C. White<sup>¶</sup>, Xiaoqiang Chen<sup>§</sup>, Hongbo Li<sup>§</sup>, Xiaolei  
Qu<sup>§</sup>, Rong Ji<sup>§\*</sup>

<sup>§</sup>State Key Laboratory of Pollution Control and Resource Reuse, School of Environment,  
Nanjing University, Nanjing 210023, China

<sup>¶</sup>Department of Analytical Chemistry, The Connecticut Agricultural Experiment Station  
(CAES), New Haven, Connecticut 06504, United States

\*Corresponding author. Tel: +86 025-8968 0581; fax: +86 025-8968 0581.

Email address: [ljzhao@nju.edu.cn](mailto:ljzhao@nju.edu.cn); [ji@nju.edu.cn](mailto:ji@nju.edu.cn)

**Page S3-5 Supporting Information for Method** (Soil pH and water soluble elements determination; Methods for GC-MS based metabolomics.

**Page S6-11** Table S1, Table S2, Table S3, Table S4

**Page S12-17** Figure S1 to S6.

## Supporting Information for Method

**Soil pH and water soluble elements determination.** Soil pH and water soluble elements were determined following the methods of Houba et al.<sup>1</sup> with some modification. Briefly, a mixture of 3 g soil and 30 mL water was shaken for two hours at 20°C and at 200 rpm. The pH of the suspension was then measured using a pH meter (Mettler-Toledo, Switzerland). After centrifugation at 10000 rpm for 10 min, the supernatant was collected and filtered through 0.22µm. The water soluble elements were determined by ICP-OES (Optima 8300, Perkin Elmer, U.S.A) and ICP-MS (NexION-300, PerkinElmer).

*Extraction of Metabolites from Plant Tissues.* First, 60 mg of tissue was weighed and transferred to a 1.5-mL Eppendorf tube containing two small steel balls. Then 360 µL of cold methanol and 40 µL of 2-chloro-l-phenylalanine (0.3 mg/mL), dissolved in methanol as internal standard, were added to each sample, which were then placed at -80 °C for 2 min and were sonicated at 60 HZ for 2 min. An aliquot of 200 µL of chloroform was added to the samples, which were then vortexed and amended with 400 µL water. The samples were vortexed again and ultrasonicated at ambient temperature for 30 min. The samples were centrifuged at 13900 g for 10 min at 4 °C. A QC sample was prepared by mixing aliquots of all samples (a pooled sample). A 300 µL aliquot of supernatant was transferred to a glass sampling vial for vacuum-drying at room temperature; 80 µL of 15 mg/mL methoxylamine hydrochloride in pyridine was then added. The resultant mixture was vortexed vigorously for 2 min and incubated at 37 °C for 90 min. Eighty µL of N,O-Bis(trimethylsilyl)trifluoroacetamide (BSTFA) (with 1% Trimethylchlorosilane) and 20 µL n-hexane was then added, and the sample was vortexed vigorously for 2 min prior to

derivatization at 70 °C for 60 min. The samples were placed at ambient temperature for 30 min before GC-MS analysis.

*Extraction of Metabolites from Soil.* One gram of soil was weighed and transferred to a 1.5-mL Eppendorf tube, followed by the addition of 1 mL of methanol and water (1: 1 = v: v) and 20 µL of 2-chloro-l-phenylalanine (0.3 mg/mL, dissolved in methanol as internal standard). The mixture was sonicated at 60 HZ for 2 min. The extraction was repeated three times and was centrifuged at 12000 rpm for 10 min at 4 °C. The supernatant was transferred to a 5-ml Eppendorf tube and freeze dried. The dried powder was resuspended in 400µL methanol: water (v: v= 1:1), vortexed for 60s followed by sonication for 30s. The suspensions were centrifuged at 12000 rpm for 10 min at 4 °C.

A QC sample was prepared by mixing aliquots of the all samples to obtain a pooled sample. An aliquot of the 300 µL supernatant was transferred to a glass sampling vial for vacuum-drying at room temperature. Eighty µL of 15 mg/mL methoxylamine hydrochloride in pyridine was subsequently added. The resulting mixture was vortexed vigorously for 2 min and incubated at 37 °C for 90 min. Eighty µL of BSTFA (with 1% TMCS) and 20 µL n-hexane was added to the mixture, which was vortexed vigorously for 2 min and then derivatized at 70 °C for 60 min. The samples were placed at ambient temperature for 30 min before GC-MS analysis.

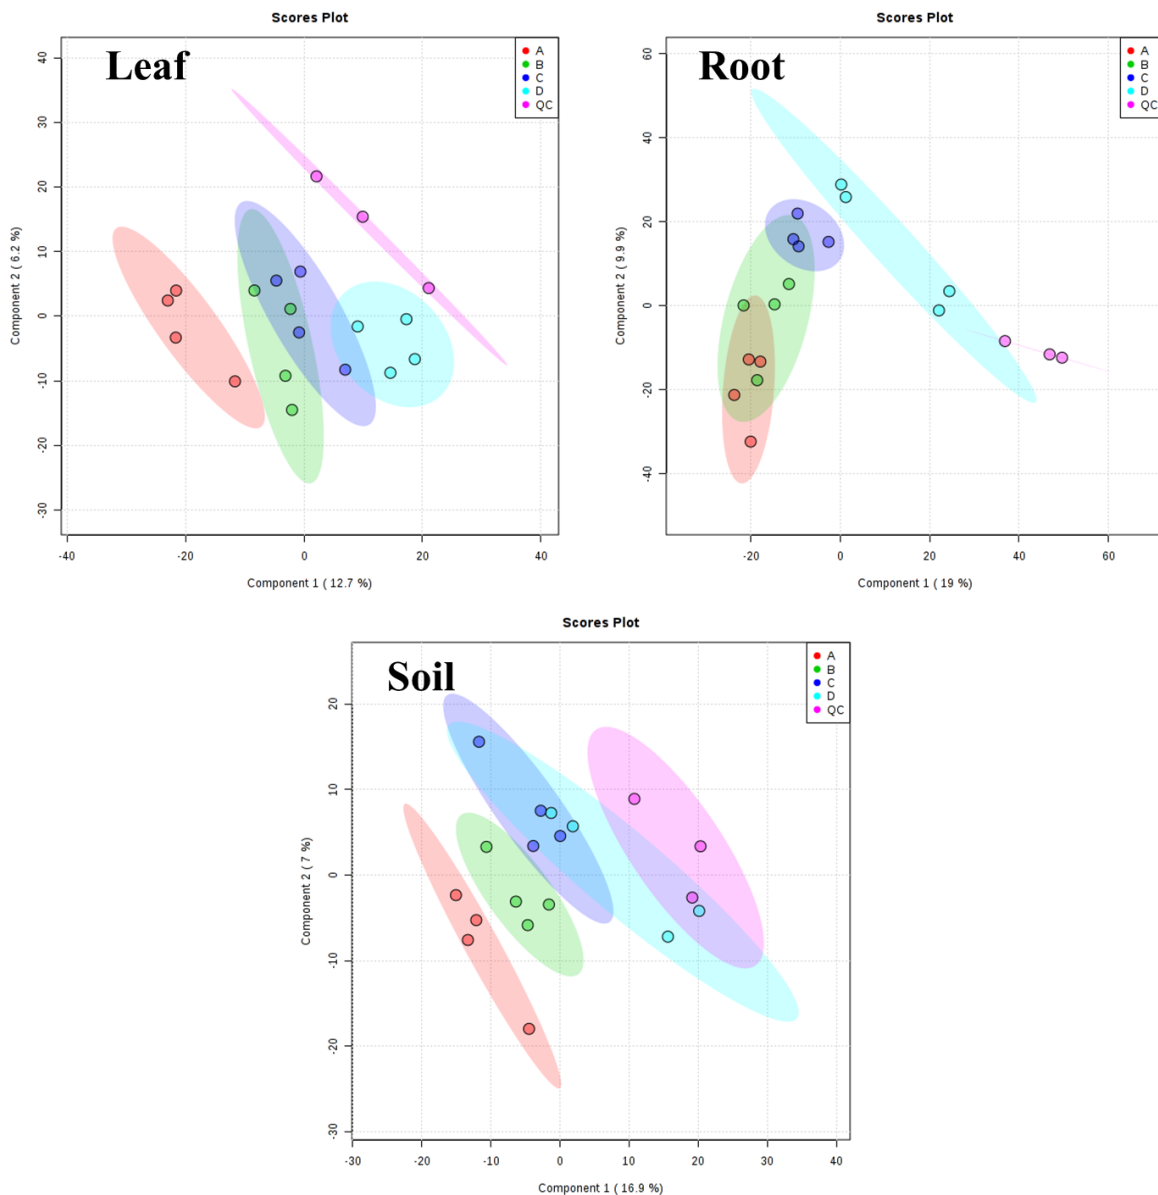

PLS-DA with QC samples (A, B, C and D represent control, SiO<sub>2</sub>, TiO<sub>2</sub> and Fe<sub>3</sub>O<sub>4</sub>, respectively)

## Reference

1. V. J. G. Houba, E. J. M. Temminghoff, G. A. Gaikhorst and W. van Vark, *Communications in Soil Science and Plant Analysis*, 2008, **31**, 1299-1396.

**Table S1.** Characteristics of engineered nanomaterials

| Nanoparticles                      | Original size (nm) | Purity | Hydrodynamic size (nm) |       | Zeta potential (mV) |      |
|------------------------------------|--------------------|--------|------------------------|-------|---------------------|------|
|                                    |                    |        | Ave                    | SD    | Ave                 | SD   |
| SiO <sub>2</sub> NPs               | 20                 | 99.9%  | 876.40                 | 41.77 | -19.50              | 0.37 |
| TiO <sub>2</sub> NPs               | 5-10               | 99.9%  | 591.50                 | 6.93  | -21.44              | 0.64 |
| Fe <sub>3</sub> O <sub>4</sub> NPs | 30                 | 99.9%  | 1230.67                | 55.54 | 11.62               | 0.64 |

**Table S2.** Significantly changed metabolites in maize tissues and soil exposure to different NPs.

| Metabolites                     | Retention time | Classification  | Control   | SiO <sub>2</sub> | TiO <sub>2</sub> | Fe <sub>3</sub> O <sub>4</sub> |
|---------------------------------|----------------|-----------------|-----------|------------------|------------------|--------------------------------|
| Leaf                            |                |                 |           |                  |                  |                                |
| L-glutamic acid                 | 16.7           | amino acid      | 15.4±0.83 | 20.7±2.42        | 23.0±1.45        | 31.1±3.88                      |
| glutamic acid                   | 19.0           | amino acid      | 34.6±10.7 | 66.2±13.0        | 79.0±5.83        | 119±15.1                       |
| oxoproline                      | 8.0            | amino acid      | 39.1±1.23 | 40.6±3.76        | 50.1±4.50        | 56.8±6.86                      |
| Isoleucine                      | 11.0           | amino acid      | 5.65±1.26 | 7.54±0.94        | 9.39±0.90        | 10.5±1.47                      |
| citrulline                      | 9.8            | amino acid      | 0.25±0.04 | 0.17±0.04        | 0.17±0.05        | 0.38±0.06                      |
| serine                          | 10.2           | amino acid      | 5.67±0.64 | 8.58±1.24        | 7.68±0.97        | 9.20±1.43                      |
| valine                          | 9.4            | amino acid      | 18.0±3.19 | 23.0±2.37        | 23.0±1.21        | 27.2±3.38                      |
| phenylalanine                   | 7.4            | amino acid      | 3.22±0.42 | 3.82±0.28        | 3.80±0.38        | 4.78±0.63                      |
| proline                         | 11.1           | amino acid      | 2.33±0.23 | 1.85±0.25        | 2.01±0.38        | 1.57±0.17                      |
| aspartic acid                   | 16.4           | amino acid      | 35.8±12.1 | 31.5±8.36        | 13.6±5.21        | 15.3±8.54                      |
| tyrosine                        | 22.6           | amino acid      | 77.7±11.1 | 89.6±5.11        | 95.0±8.94        | 96.9±4.84                      |
| glycine                         | 7.8            | amino acid      | 5.37±1.65 | 5.80±0.42        | 4.15±0.50        | 3.56±0.59                      |
| Benzoylformic acid              | 6.0            | organic acid    | 1.56±0.13 | 1.41±0.08        | 0.97±0.07        | 0.88±0.09                      |
| 4-aminobutyric acid             | 16.6           | organic acid    | 4.96±1.04 | 10.7±1.47        | 15.5±4.27        | 12.6±0.70                      |
| Pyruvic acid                    | 6.5            | organic acid    | 14.6±1.97 | 12.2±2.38        | 14.3±1.75        | 7.6±0.56                       |
| 2-ketobutyric acid              | 5.7            | organic acid    | 2.35±0.21 | 2.81±0.38        | 3.08±0.37        | 3.98±0.56                      |
| alpha-ketoglutaric acid         | 17.2           | organic acid    | 0.52±0.04 | 0.59±0.08        | 0.65±0.10        | 0.89±0.13                      |
| 3-Hexenedioic acid              | 9.6            | organic acid    | 0.29±0.06 | 0.32±0.06        | 0.45±0.05        | 0.56±0.10                      |
| lactic acid                     | 6.7            | organic acid    | 6.77±0.57 | 4.46±0.45        | 6.75±0.81        | 3.97±1.18                      |
| 2,4-diaminobutyric acid         | 8.7            | organic acid    | 8.26±0.47 | 8.27±0.44        | 8.42±0.33        | 10.1±0.93                      |
| Threonic acid                   | 16.9           | organic acid    | 3.13±0.53 | 4.22±0.87        | 3.64±0.06        | 5.20±0.79                      |
| 3-hydroxypyruvate               | 37.3           | organic acid    | 0.80±0.42 | 1.45±0.34        | 1.25±0.57        | 2.69±0.51                      |
| gluconic acid                   | 28.2           | organic acid    | 2.89±0.26 | 3.13±0.57        | 3.41±0.71        | 2.06±0.39                      |
| Saccharic acid                  | 27.3           | organic acid    | 178±29.9  | 239±30.3         | 229±19.9         | 190±15.4                       |
| citric acid                     | 24.1           | organic acid    | 8.32±0.60 | 8.51±0.61        | 8.69±0.72        | 10.1±0.83                      |
| succinic acid                   | 11.5           | fatty acid      | 5.32±0.89 | 4.02±0.36        | 3.87±0.35        | 3.78±0.54                      |
| xylose                          | 19.9           | sugar           | 27.1±1.06 | 29.5±0.65        | 29.1±0.77        | 27.3±0.31                      |
| fructose-6-phosphate            | 34.9           | sugar           | 3.22±0.16 | 2.88±0.23        | 2.45±0.12        | 3.09±0.39                      |
| alpha-D-glucosamine 1-phosphate | 32.7           | sugar           | 0.84±0.28 | 1.05±0.10        | 0.57±0.12        | 1.22±0.22                      |
| maltotriose                     | 41.4           | sugar           | 4.09±0.48 | 5.61±1.38        | 4.64±1.40        | 2.99±0.56                      |
| palatinitol                     | 40.6           | sugar alchcohol | 8.61±1.09 | 9.63±1.01        | 10.7±0.60        | 13.6±1.72                      |
| Dodecanol                       | 14.3           | alchcohol       | 11.6±5.57 | 5.35±0.44        | 8.07±4.29        | 3.74±0.50                      |
| N-methylaniline                 | 12.8           | others          | 0.00±0.00 | 0.02±0.04        | 0.00±0.00        | 0.10±0.02                      |

|                                            |      |                |                 |                 |                 |                 |
|--------------------------------------------|------|----------------|-----------------|-----------------|-----------------|-----------------|
| Synephrine                                 | 26.7 | others         | $1.10 \pm 0.32$ | $1.15 \pm 0.16$ | $0.95 \pm 0.70$ | $0.00 \pm 0.00$ |
| octanal                                    | 7.1  | others         | $0.89 \pm 0.09$ | $0.86 \pm 0.03$ | $0.92 \pm 0.03$ | $1.26 \pm 0.20$ |
| uracil                                     | 11.9 | others         | $8.57 \pm 1.34$ | $6.12 \pm 0.31$ | $7.27 \pm 1.48$ | $5.09 \pm 0.61$ |
| creatine degr                              | 5.5  | others         | $202 \pm 43.0$  | $251 \pm 39.1$  | $280 \pm 48.1$  | $387 \pm 72.7$  |
| Cytosin                                    | 16.4 | others         | $1.19 \pm 0.18$ | $0.88 \pm 0.10$ | $0.86 \pm 0.15$ | $0.72 \pm 0.08$ |
| 5,6-dihydrouracil                          | 7.0  | others         | $0.85 \pm 0.15$ | $0.97 \pm 0.18$ | $1.35 \pm 0.17$ | $1.14 \pm 0.19$ |
| Maleimide                                  | 6.5  | others         | $0.75 \pm 0.13$ | $0.59 \pm 0.04$ | $0.59 \pm 0.21$ | $0.29 \pm 0.12$ |
| 2'-Deoxycytidine 5'-triphosphate degr prod | 5.5  | others         | $70.5 \pm 44.9$ | $31.8 \pm 1.10$ | $29.4 \pm 5.48$ | $21.8 \pm 2.38$ |
| Nicotinoylglycine                          | 6.2  | others         | $5.35 \pm 0.22$ | $5.73 \pm 0.50$ | $6.38 \pm 0.48$ | $6.43 \pm 0.72$ |
| Carnitine                                  | 9.3  | others         | $0.37 \pm 0.06$ | $0.50 \pm 0.06$ | $0.67 \pm 0.09$ | $0.51 \pm 0.14$ |
| putrescine                                 | 14.1 | others         | $65.1 \pm 5.85$ | $70.2 \pm 5.82$ | $77.0 \pm 5.40$ | $81.8 \pm 6.29$ |
| succinate semialdehyde                     | 8.9  | others         | $0.05 \pm 0.05$ | $0.23 \pm 0.07$ | $0.33 \pm 0.04$ | $0.41 \pm 0.14$ |
| Hydantoin, 5-4-hydroxybutyl-               | 14.3 | others         | $0.90 \pm 0.48$ | $0.40 \pm 0.06$ | $1.26 \pm 0.76$ | $0.53 \pm 0.03$ |
| D-erythronolactone                         | 12.8 | others         | $0.91 \pm 0.12$ | $1.16 \pm 0.20$ | $1.00 \pm 0.04$ | $1.30 \pm 0.19$ |
| N-Carbamylglutamate                        | 23.0 | others         | $1.37 \pm 0.44$ | $0.87 \pm 0.09$ | $0.79 \pm 0.11$ | $0.81 \pm 0.04$ |
| N-Acetyl-beta-D-mannosamine                | 30.2 | others         | $0.27 \pm 0.05$ | $0.35 \pm 0.03$ | $0.31 \pm 0.03$ | $0.27 \pm 0.02$ |
| Root                                       |      |                |                 |                 |                 |                 |
| ornithine                                  | 10.2 | amino acid     | $24.1 \pm 3.43$ | $25.6 \pm 4.89$ | $20.0 \pm 3.20$ | $12.8 \pm 1.38$ |
| homovanillic acid                          | 31.3 | organic acid   | $0.70 \pm 0.34$ | $0.38 \pm 0.07$ | $0.58 \pm 0.10$ | $1.10 \pm 0.18$ |
| D-glyceric acid                            | 11.8 | organic acid   | $4.84 \pm 0.42$ | $4.94 \pm 0.20$ | $4.98 \pm 0.61$ | $6.37 \pm 0.15$ |
| beta-hydroxypyruvate                       | 5.3  | organic acid   | $1.59 \pm 0.11$ | $1.64 \pm 0.14$ | $1.54 \pm 0.12$ | $1.15 \pm 0.17$ |
| mannose                                    | 27.7 | sugar          | $0.95 \pm 0.10$ | $0.68 \pm 0.09$ | $0.71 \pm 0.06$ | $0.68 \pm 0.04$ |
| phosphate                                  | 8.9  | inorganic acid | $603 \pm 32.6$  | $552 \pm 31.1$  | $532 \pm 21.8$  | $631 \pm 15.6$  |
| adenine                                    | 25.2 | others         | $6.36 \pm 0.45$ | $6.13 \pm 0.56$ | $4.35 \pm 0.50$ | $5.76 \pm 0.27$ |
| Soil                                       |      |                |                 |                 |                 |                 |
| 4-hydroxycinnamic acid                     | 25.7 | organic acid   | $6.84 \pm 2.04$ | $15.3 \pm 6.27$ | $18.0 \pm 3.65$ | $11.3 \pm 1.70$ |
| gluconic acid                              | 25.6 | organic acid   | $0.93 \pm 0.34$ | $1.76 \pm 0.72$ | $1.61 \pm 0.25$ | $1.98 \pm 0.47$ |
| linolenic acid                             | 24.7 | fatty acid     | $0.93 \pm 0.24$ | $1.58 \pm 0.47$ | $1.33 \pm 0.18$ | $1.46 \pm 0.30$ |
| levoglucosan                               | 19.1 | sugar          | $4.96 \pm 0.20$ | $6.31 \pm 0.78$ | $6.74 \pm 0.65$ | $9.03 \pm 0.99$ |
| allo-inositol                              | 24.7 | alcohol        | $3.96 \pm 0.26$ | $4.74 \pm 0.73$ | $5.47 \pm 0.18$ | $5.56 \pm 0.95$ |
| methyl-beta-D-galactopyranoside            | 18.4 | glycoside      | $6.00 \pm 0.70$ | $7.35 \pm 0.91$ | $8.38 \pm 1.69$ | $10.2 \pm 1.15$ |
| beta-mannosylglycerate                     | 26.2 | others         | $37.7 \pm 7.83$ | $55.5 \pm 4.43$ | $48.8 \pm 7.66$ | $63.3 \pm 14.5$ |
| methyl phosphate                           | 8.8  | others         | $2.02 \pm 0.21$ | $2.75 \pm 0.64$ | $2.76 \pm 0.17$ | $3.51 \pm 0.31$ |

Data are average of four replicates.



**Table S3.** Perturbed biological pathways in maize leaves exposed to different engineered nanomaterials at 100 mg/kg soil

| Pathway Name                                | <i>p</i> | Impact | Involved metabolites                                                                                                                  |
|---------------------------------------------|----------|--------|---------------------------------------------------------------------------------------------------------------------------------------|
|                                             |          |        | Fe <sub>3</sub> O <sub>4</sub>                                                                                                        |
| Arginine and proline metabolism             | 1.46E-05 | 0.4571 | Gamma-Aminobutyric acid, L-Glutamic acid, L-Proline, L-Glutamine, Citrulline, Putrescine, L-Aspartic acid, Fumaric acid, Ornithine    |
| Glycine, serine and threonine metabolism    | 0.013063 | 0.6112 | Pyruvic acid, 2-ketobutyric acid, L-Serine, Hydroxypyruvic acid, L-Allothreonine, L-Homoserine, L-Threonine, Glycine, L-Aspartic acid |
| Valine, leucine and isoleucine biosynthesis | 0.020143 | 0.1178 | Pyruvic acid, 2-ketobutyric acid, L-Isoleucine, L-Valine, L-Leucine, L-Threonine, Citraconic acid                                     |
| Tyrosine metabolism                         | 0.028945 | 0.2727 | L-Tyrosine, Succinic acid semialdehyde, Succinic acid, Fumaric acid                                                                   |
| Methane metabolism                          | 0.002066 | 0.1667 | L-Serine, Glycine                                                                                                                     |
| Isoquinoline alkaloid biosynthesis          | 0.019843 | 0.5    | L-Tyrosine                                                                                                                            |
| Pantothenate and CoA biosynthesis           | 1.82E-04 | 0.1081 | Pyruvic acid, Uracil, L-Valine, Dihydrouracil,                                                                                        |
| Citrate cycle (TCA cycle)                   | 3.46E-04 | 0.3806 | Pyruvic acid, Oxoglutaric acid, Citric acid, Succinic acid, Fumaric acid, L-Malic acid, Cis-Aconitic acid, Isocitric acid             |
| Glycolysis or Gluconeogenesis               | 3.62E-04 | 0.1211 | Pyruvic acid, L-Lactic acid, Glucose 1-phosphate                                                                                      |
| Pyruvate metabolism                         | 4.27E-04 | 0.1487 | Pyruvic acid, L-Lactic acid, L-Malic acid                                                                                             |
| Pyrimidine metabolism                       | 0.012617 | 0.1246 | L-Glutamine, Uracil, Orotic acid, Dihydrouracil, 3-Aminoisobutanoic acid, Thymidine, Thymine                                          |
|                                             |          |        | TiO <sub>2</sub>                                                                                                                      |
| Arginine and proline metabolism             | 1.76E-04 | 0.4571 | Gamma-Aminobutyric acid, L-Glutamic acid, L-Aspartic acid, Putrescine, Citrulline, L-Proline, L-Glutamine, Fumaric acid, Ornithine    |
| Pantothenate and CoA biosynthesis           | 0.005862 | 0.1081 | Dihydrouracil, L-Valine, Uracil, Pyruvic acid                                                                                         |
| Methane metabolism                          | 0.006689 | 0.1667 | L-Serine, Glycine                                                                                                                     |
| Glycerophospholipid metabolism              | 0.012036 | 0.181  | Ethanolamine, Glycerol 3-phosphate                                                                                                    |

|                                          |          |        |                                                                                                                                    |
|------------------------------------------|----------|--------|------------------------------------------------------------------------------------------------------------------------------------|
| Pyrimidine metabolism                    | 0.016486 | 0.1246 | Dihydrouracil, 3-Aminoisobutanoic acid, Thymidine, Orotic acid, Uracil, Thymine, L-Glutamine                                       |
| Isoquinoline alkaloid biosynthesis       | 0.016531 | 0.5    | L-Tyrosine                                                                                                                         |
| Citrate cycle (TCA cycle)                | 0.019723 | 0.3806 | Oxoglutaric acid, Succinic acid, Isocitric acid, Cis-Aconitic acid, Citric acid, L-Malic acid, Fumaric acid, Pyruvic acid          |
| Tyrosine metabolism                      | 0.03208  | 0.2727 | L-Tyrosine, Succinic acid semialdehyde, Succinic acid, Fumaric acid                                                                |
| Glyoxylate and dicarboxylate metabolism  | 0.036189 | 0.7042 | Succinic acid, Isocitric acid, Cis-Aconitic acid, Citric acid, L-Malic acid, Glycolic acid                                         |
|                                          |          |        | SiO <sub>2</sub>                                                                                                                   |
| Arginine and proline metabolism          | 0.001322 | 0.4571 | Gamma-Aminobutyric acid, L-Glutamine, L-Glutamic acid, L-Proline, Citrulline, Fumaric acid, Putrescine, Ornithine, L-Aspartic acid |
| Glycolysis or Gluconeogenesis            | 0.004142 | 0.1211 | L-Lactic acid, Pyruvic acid, Glucose 1-phosphate                                                                                   |
| Pyruvate metabolism                      | 0.004753 | 0.1487 | L-Lactic acid, Pyruvic acid, L-Malic acid                                                                                          |
| Methane metabolism                       | 0.014631 | 0.1667 | L-Serine, Glycine                                                                                                                  |
| Pantothenate and CoA biosynthesis        | 0.020762 | 0.1081 | Uracil, L-Valine, Pyruvic acid, Dihydrouracil                                                                                      |
| Glycine, serine and threonine metabolism | 0.022363 | 0.5348 | L-Serine, Hydroxypyruvic acid, 2-ketobutyric acid, L-Allothreonine, L-Threonine, Pyruvic acid, Glycine, L-Aspartic acid            |

**Table S4.** Perturbed biological pathways in maize roots exposed to different engineered nanomaterials of 100 mg/kg soil

| Pathway Name                            | p        | Impact | Involved metabolites                                                                                                       |
|-----------------------------------------|----------|--------|----------------------------------------------------------------------------------------------------------------------------|
| <b>Fe<sub>3</sub>O<sub>4</sub></b>      |          |        |                                                                                                                            |
| Inositol phosphate metabolism           | 0.002597 | 0.245  | D-Glucuronic acid, Myoinositol                                                                                             |
| Ascorbate and aldarate metabolism       | 0.01273  | 1      | D-Glucuronic acid, Ascorbic acid, Myoinositol, D- Glutarate                                                                |
| Glycerolipid metabolism                 | 0.01709  | 0.2222 | Glyceric acid, Glycerol, Glycerol 3-phosphate                                                                              |
| Citrate cycle (TCA cycle)               | 0.02991  | 0.3806 | Pyruvic acid, Oxoglutaric acid, Citric acid, Succinic acid, Fumaric acid, L-Malic acid, Cis-Aconitic acid, Isocitric acid  |
| <b>TiO<sub>2</sub></b>                  |          |        |                                                                                                                            |
| Inositol phosphate metabolism           | 0.022634 | 0.245  | D-Glucuronic acid, Myoinositol                                                                                             |
| Ascorbate and aldarate metabolism       | 0.024315 | 1      | D-Glucuronic acid, Ascorbic acid, Myoinositol, D-Glucarate                                                                 |
| Methane metabolism                      | 0.035033 | 0.1667 | L-Serine, Glycine                                                                                                          |
| Citrate cycle (TCA cycle)               | 0.043907 | 0.3806 | Citric acid, Isocitric acid, L-Malic acid, Oxoglutaric acid, Succinic acid, Fumaric acid, Pyruvic acid, Cis-Aconitic acid, |
| Glyoxylate and dicarboxylate metabolism | 0.049186 | 0.7042 | Citric acid, Isocitric acid, L-Malic acid, Glycolic acid, Succinic acid, Cis-Aconitic acid,                                |
| <b>SiO<sub>2</sub></b>                  |          |        |                                                                                                                            |
| Inositol phosphate metabolism           | 0.009897 | 0.245  | D-Glucuronic acid, Myoinositol                                                                                             |
| Citrate cycle (TCA cycle)               | 0.019425 | 0.3806 | Isocitric acid, Oxoglutaric acid, L-Malic acid, Succinic acid, Fumaric acid, Citric acid, Pyruvic acid, Cis-Aconitic acid  |

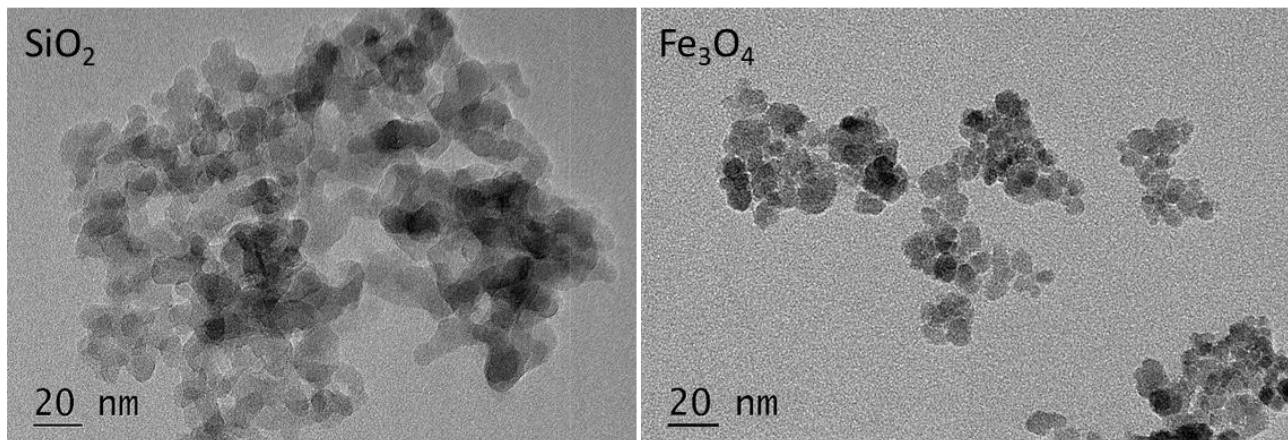

**Figure S1.** Representative TEM images of  $\text{SiO}_2$  and  $\text{Fe}_3\text{O}_4$  with a scale bar of 20 nm.

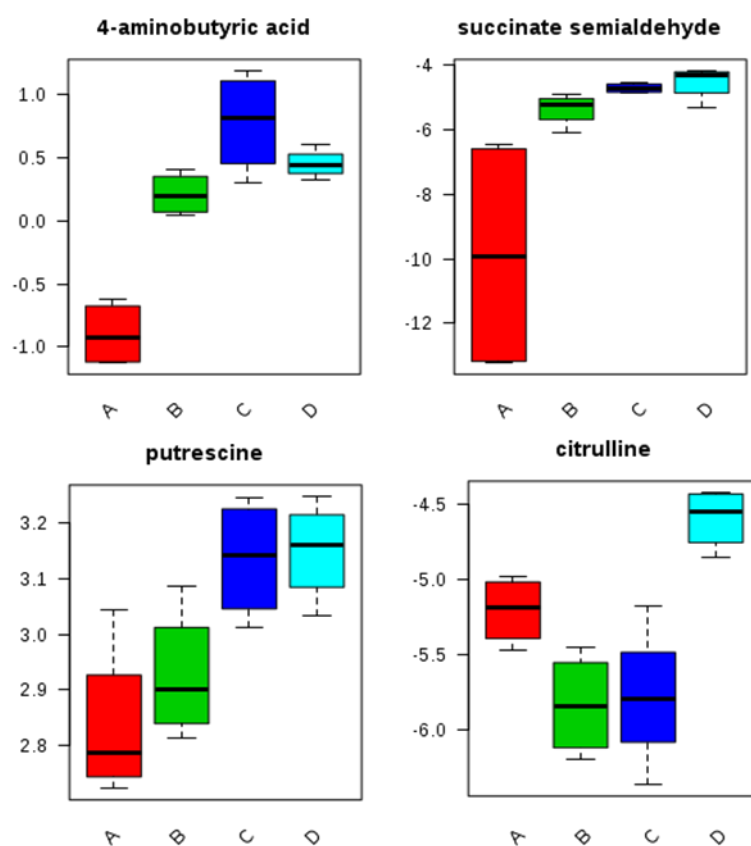

**Figure S2.** The relative abundance of four nitrogen-related compounds in maize leaves grown in soil without (control, A) or with ENMs (B, SiO<sub>2</sub>; C, TiO<sub>2</sub>; D, Fe<sub>3</sub>O<sub>4</sub>).

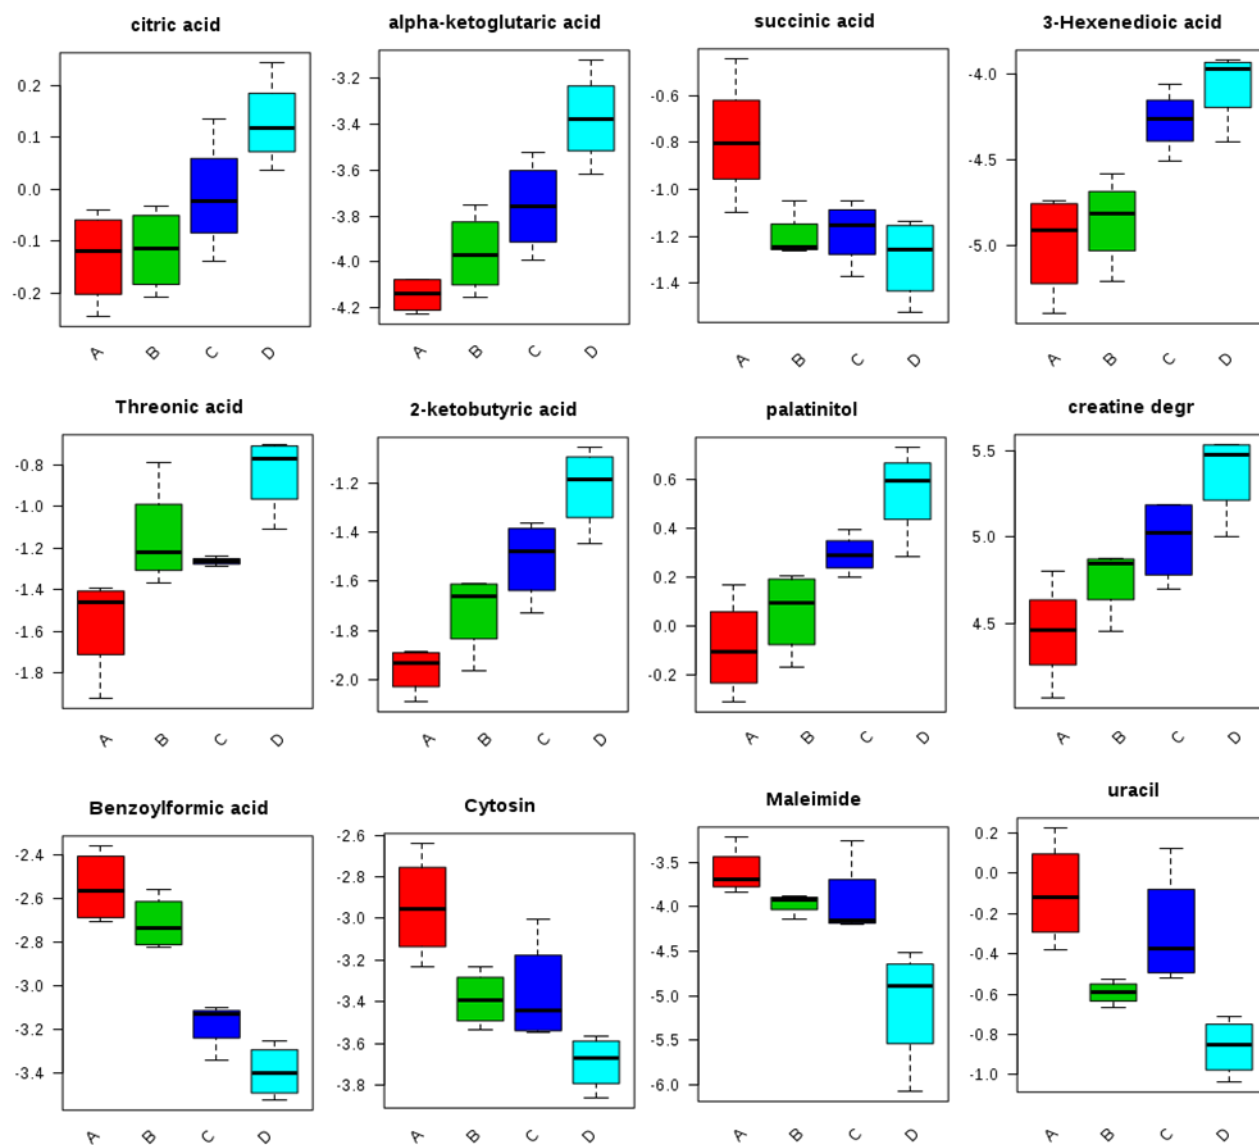

**Figure S3.** Up-regulated and down-regulated carbohydrates in maize leaves in response to ENMs exposure. A, B, C and D represent control, SiO<sub>2</sub>, TiO<sub>2</sub> and Fe<sub>3</sub>O<sub>4</sub> respectively.

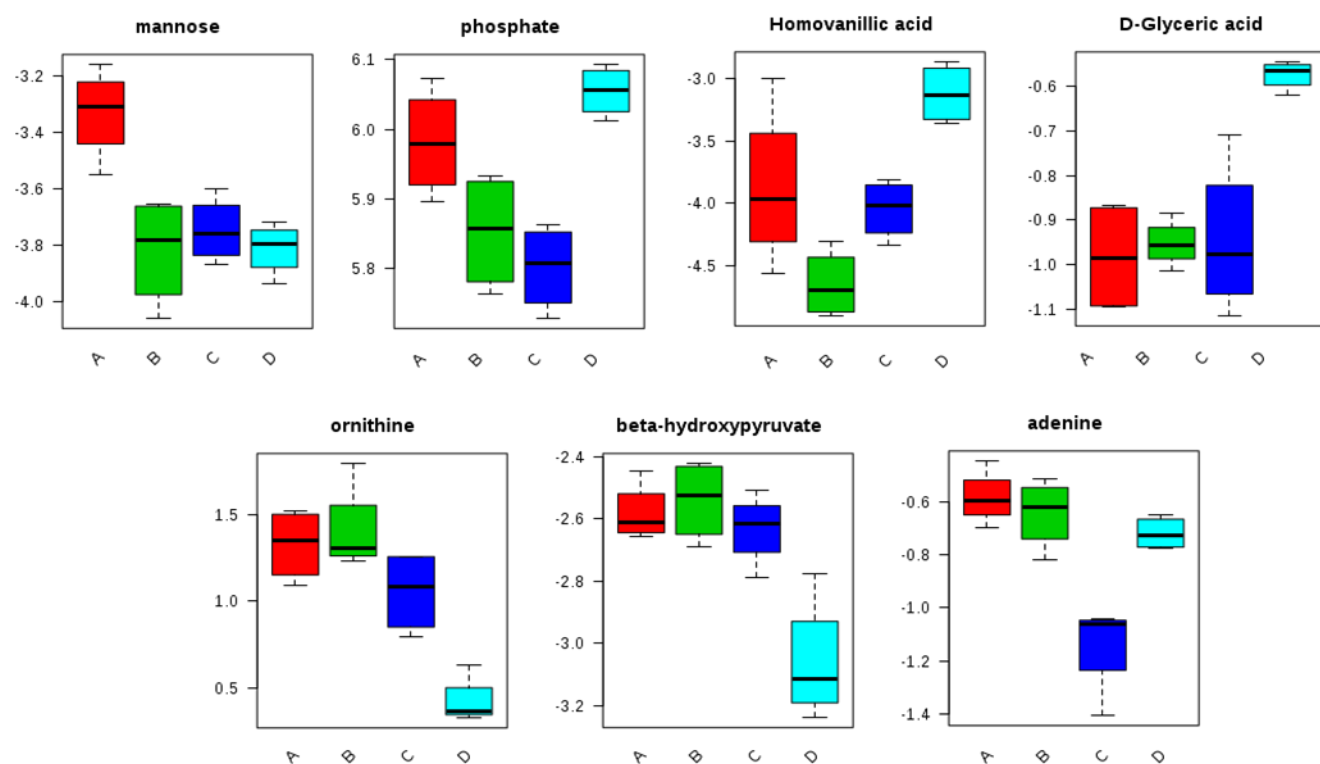

**Figure S4.** Significantly changed metabolites in maize roots as a function of ENMs exposure. A, B, C and D represent control, SiO<sub>2</sub>, TiO<sub>2</sub> and Fe<sub>3</sub>O<sub>4</sub> respectively.

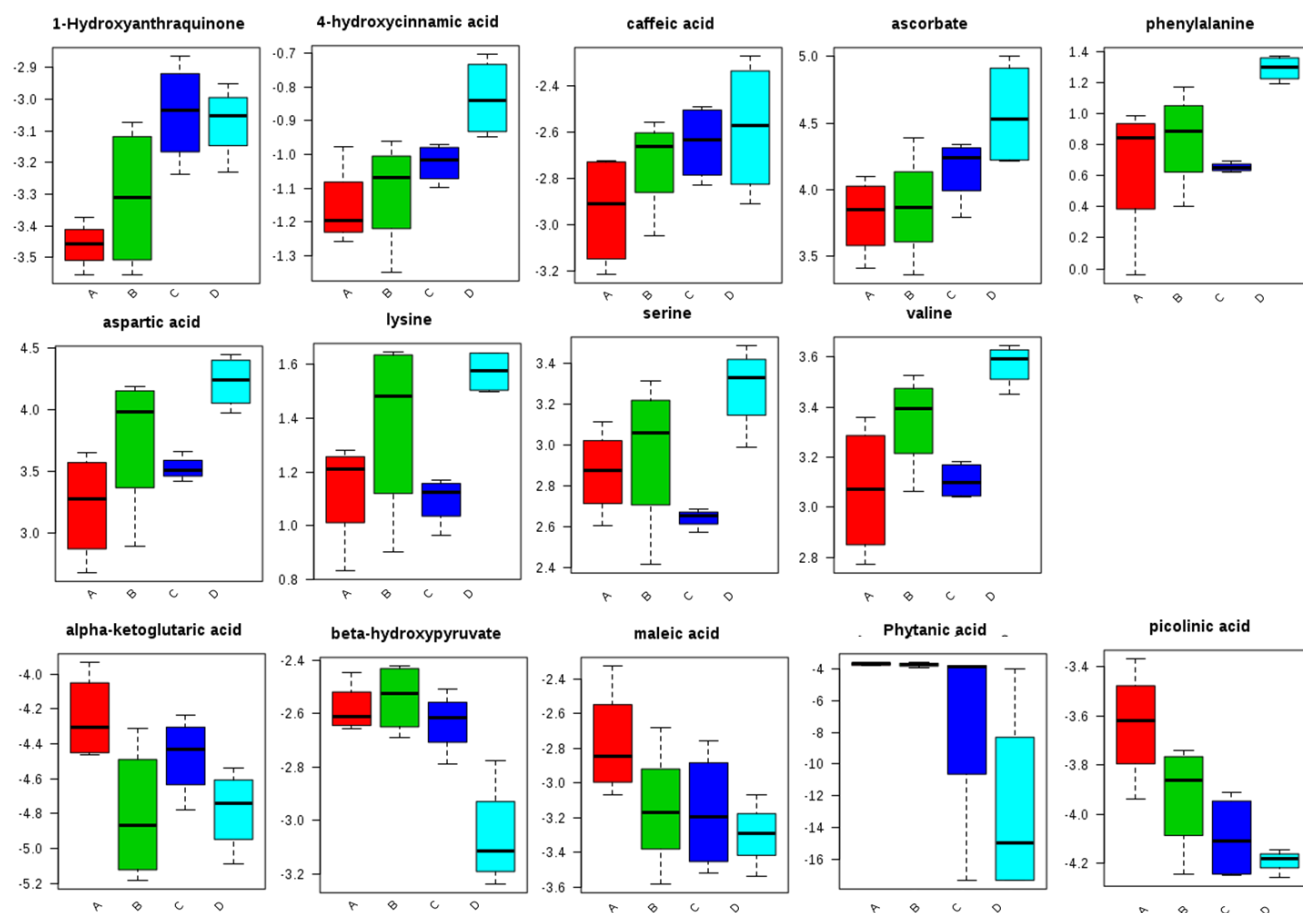

**Figure S5.** Metabolites in maize roots that only respond to Fe<sub>3</sub>O<sub>4</sub>. A, B, C and D represent control, SiO<sub>2</sub>, TiO<sub>2</sub> and Fe<sub>3</sub>O<sub>4</sub> respectively.



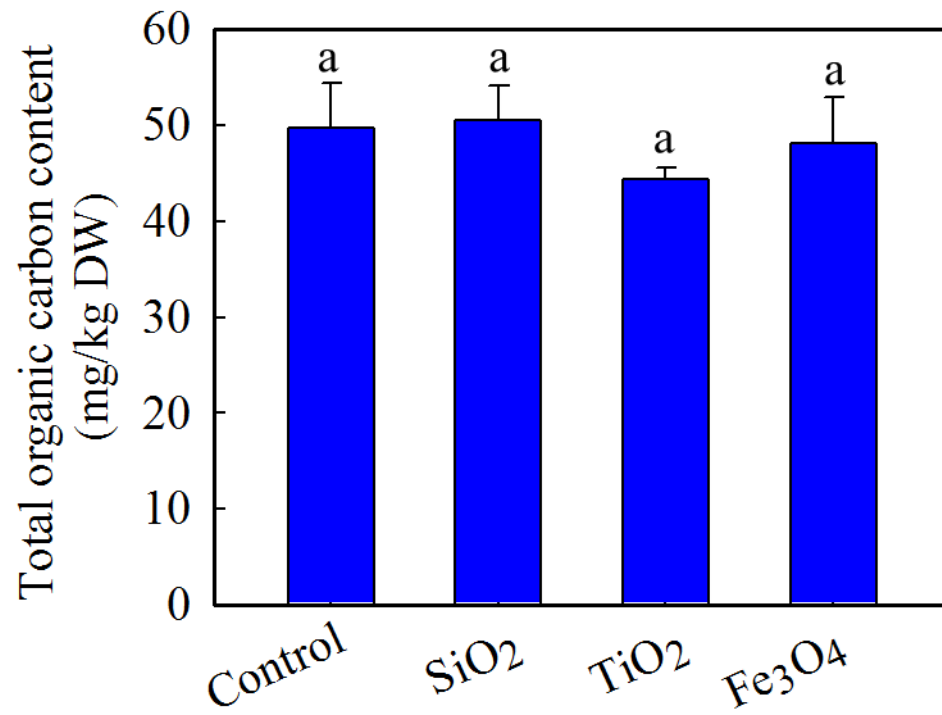

**Figure S6.** Total organic carbon content in soil spiked with different ENMs dosing at 100 mg/kg.
